# Supplementary material
Source: PubMed Central journal article supplement (PMC8443691)
Supplement: NIHMS1684910-supplement-SUP.pdf [file NIHMS1684910-supplement-SUP.pdf]

**Supplemental figure S1.** Overview of the study.

**Supplemental figure S2.** Genome-wide discovery and validation of a novel gene panel to detect recurrence in patients with ICC. **A–B)** A ROC curve demonstrates the diagnostic performance of the 8-gene panel for distinguish the patients with recurrence in **(A)** GSE107943 (AUC = 0.92), and **(B)** TCGA (AUC = 0.91). **C–D)** A comparison of RFS between high and low-risk group estimated by the panel in **(C)** GSE107943, and **(D)** TCGA.

**Supplemental Figure S3.** ROC curves for the detection of recurrence in training and validation cohorts without transcriptomic panel. **A)** ROC curve for combined clinical risk factors (CA19-9, CE A, vascular invasion, and tumor size) for recurrence without the transcriptomic panel in the training cohort (AUC = 0.71). **B)** ROC curve for the clinical risk factors for recurrence without the panel in the validation cohort (AUC = 0.69).

# Supplementary Figure 1

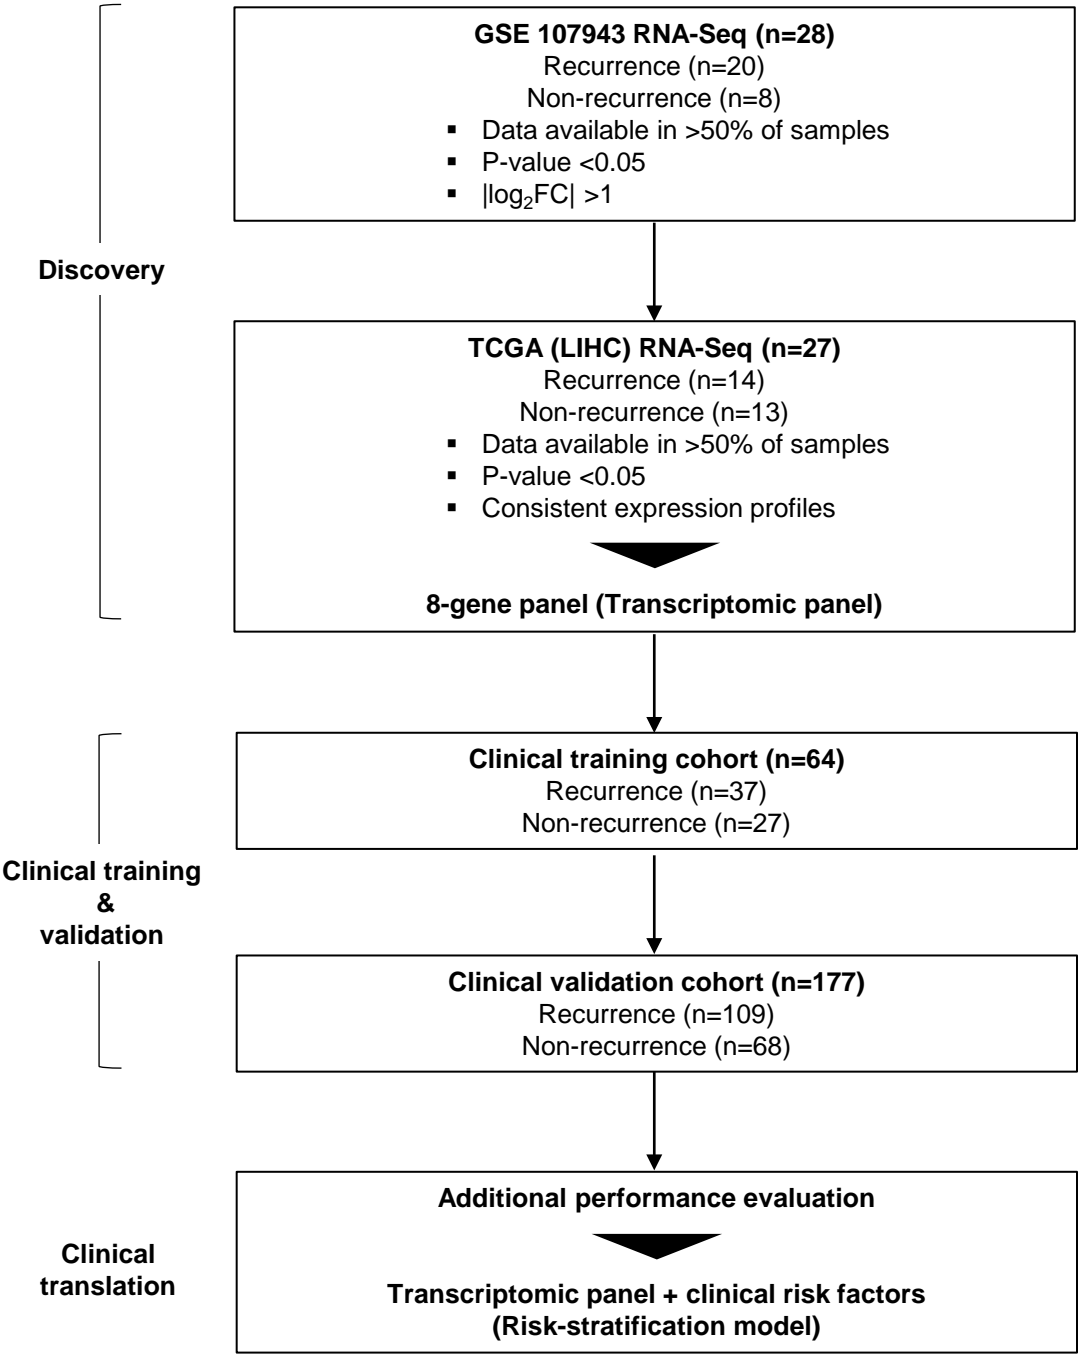

# Supplementary Figure 2

**A**

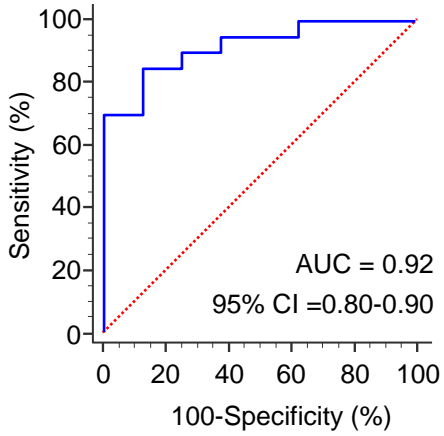

**B**

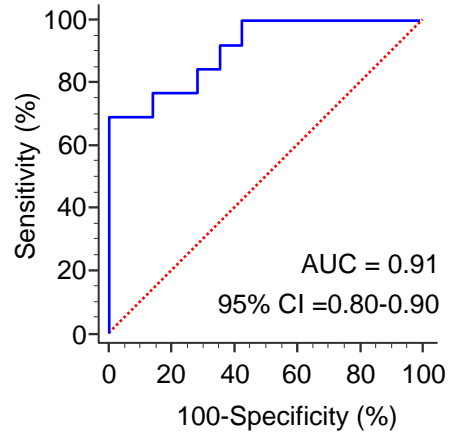

**C**

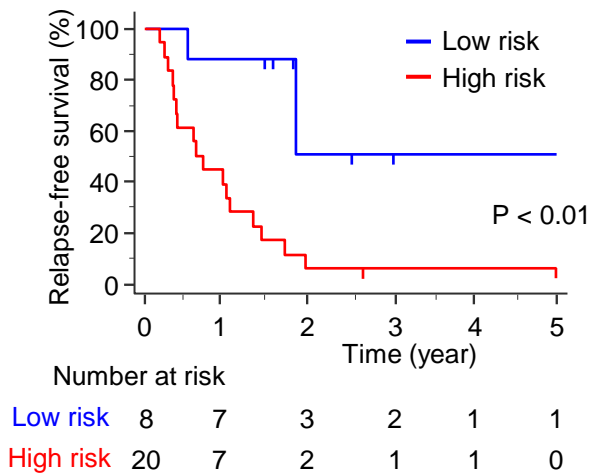

**D**

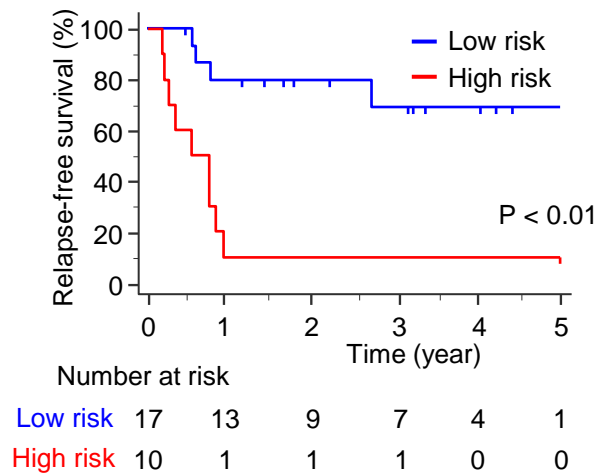

# Supplementary Figure 3

**A**

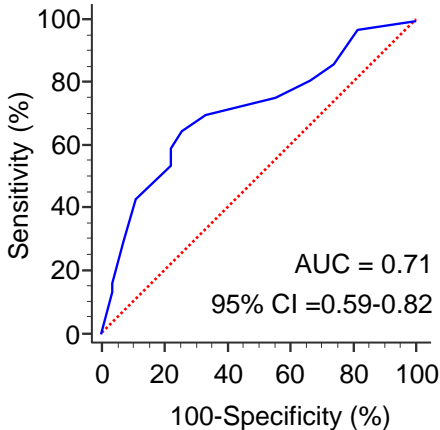

**B**

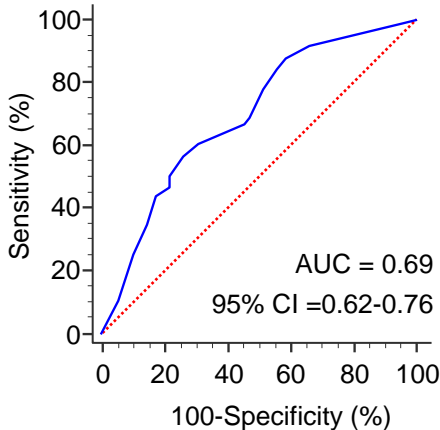

## Supplementary Table 1. Primer Sequences

| Name         | Sequence                  |
|--------------|---------------------------|
| BIRC5_F      | TTCAAGGAGCTGGAAGGCTG      |
| BIRC5_R      | GCAACCGGACGAATGCTTTT      |
| CDC20_F      | GCAAGGAGAACCAGCCTGAA      |
| CDC20_R      | CGTTCAGGTTCAAAGCCCAG      |
| CDH2_F       | ATTGCCATCCTGCTCTGCAT      |
| CDH2_R       | TCCCGGCGTTTCATCCATAC      |
| CENPW_F      | GCCTCAACTTCGTCTGGAGA      |
| CENPW_R      | ACAAGCGTTTGTCTGGACT       |
| JPH1_F       | TGCCTTACTATTTTACCATCTGACG |
| JPH1_R       | ATTCCTCGGGCAGTCGTT        |
| MAD2L1_F     | TCTGCCACTGTTGGAAGTTTCT    |
| MAD2L1_R     | TGGTCCCGACTCTTCCCATT      |
| NEIL3_F      | GCCCTCTTCTAAGGCATGTGA     |
| NEIL3_R      | TTCTTCACTCTTGAGCACTGAA    |
| POC1A_F      | GCATATCAACTGGGTCCGCT      |
| POC1A_R      | GTCATCACTGGCAGACACGA      |
| Actin Beta_F | CCTTTGCCGATCCGCCG         |
| Actin Beta_R | GATATCATCCATGGTGAGCTGG    |

*F, forward; R, reverse*
